# Supplementary material
Source: HighWire-hosted journal article supplement (http://www.qdcxjkg.com/highwire/filestream/113821/field_highwire_adjunct_files/0/ERJ-01762-2012_Disclosures.pdf)
Supplement: ERJ-01762-2012_Disclosures.pdf [file ERJ-01762-2012_Disclosures.pdf]

**Z-C. Jing** has relationships with drug companies including Actelion, Bayer Schering, Pfizer and United Therapeutics, in addition to being an investigator in trials sponsored by these companies relationships include: consultancy services and membership of scientific advisory boards.
